# Supplementary material for: The creation of the Global Scales for Early Development (GSED) for children aged 0–3 years: combining subject matter expert judgements with big data
Source: PubMed Central journal article supplement (PMC9853147; doi:10.1136/bmjgh-2022-009827), 2023-01-17
Supplement: bmjgh-2022-009827supp001.pdf [file bmjgh-2022-009827supp001.pdf]

The screenshot shows a matching tool interface with several columns labeled "No match". Three callout boxes provide instructions:

- Use the age range and domains for quicker navigation**: A callout box pointing to a dropdown menu in the top left corner.
- Tip: use "page down" to efficiently skim through the items to be matched**: A callout box pointing to the "No match" labels.
- Do not put anything in red cells**: A callout box pointing to a red cell in the interface.

| Criteria         | Very Strong                                                 | Strong                                                        | Partial                                                         | No match                                                    |
|------------------|-------------------------------------------------------------|---------------------------------------------------------------|-----------------------------------------------------------------|-------------------------------------------------------------|
| <b>Behaviour</b> | Measures the same underlying behaviour                      | Measures a similar underlying behaviour                       | Measures a somewhat similar underlying behaviour                | Does not measure the same behaviour                         |
| <b>Wording</b>   | Very few or no words difference                             | Some words difference                                         | Many words difference                                           | Very different wording                                      |
| <b>Facility</b>  | Measures exactly the same level of facility (if applicable) | Measures a similar quantity level of facility (if applicable) | Measures a somewhat different level of facility (if applicable) | Measures a very different level of facility (if applicable) |
