# Supplementary material for: The creation of the Global Scales for Early Development (GSED) for children aged 0–3 years: combining subject matter expert judgements with big data
Source: PubMed Central journal article supplement (PMC9853147; doi:10.1136/bmjgh-2022-009827), 2023-01-17
Supplement: bmjgh-2022-009827supp002.pdf [file bmjgh-2022-009827supp002.pdf]

## GSED-LF

### Question

**"Can the child count up to five objects (e.g., fingers, people)?"**

**Modality:** Caregiver Report, **Response options:** Yes/No

### Feasibility

|                                                                                   | Level of Concern                 |                       | Rationale for concern<br>Optional text |
|-----------------------------------------------------------------------------------|----------------------------------|-----------------------|----------------------------------------|
|                                                                                   | Not Concerned                    | Concerned             |                                        |
| Difficulties in translation to certain language(s)                                | <input checked="" type="radio"/> | <input type="radio"/> | <input type="text"/>                   |
| Requires major adaptation to specific contexts (e.g., not culturally appropriate) | <input checked="" type="radio"/> | <input type="radio"/> | <input type="text"/>                   |
| Caregivers will likely not know this about their child                            | <input checked="" type="radio"/> | <input type="radio"/> | <input type="text"/>                   |
| Other Concern [Please Specify]                                                    | <input checked="" type="radio"/> | <input type="radio"/> | <input type="text"/>                   |

## GSED-SF

### Question

**"Laughs aloud"**

**Examiner's action:** Listen for the child to laugh aloud. If this is not heard, ask the caregiver if the child does his. 1 point: Hear the child laugh aloud or if the caregiver reports he/she does this. 0 points: Child is not observed laughing out loud and caregiver reports he/she does not do this.

**Child's action:** 1 point: Hear the child laugh aloud or if the caregiver reports he/she does this. 0 points: Child is not observed laughing out loud and caregiver reports he/she does not do this.

**Modality:** Direct Assessment, **Response options:** Yes/No

### Feasibility

|                                                                                   | Level of Concern                 |                       | Rationale for concern<br>Optional text |
|-----------------------------------------------------------------------------------|----------------------------------|-----------------------|----------------------------------------|
|                                                                                   | Not Concerned                    | Concerned             |                                        |
| Difficulties in translation to certain language(s)                                | <input checked="" type="radio"/> | <input type="radio"/> | <input type="text"/>                   |
| Requires major adaptation to specific contexts (e.g., not culturally appropriate) | <input checked="" type="radio"/> | <input type="radio"/> | <input type="text"/>                   |
| Difficulties in the administration of item/observation of skill or behaviour      | <input checked="" type="radio"/> | <input type="radio"/> | <input type="text"/>                   |
| Difficulties in obtaining/making required materials in certain context            | <input checked="" type="radio"/> | <input type="radio"/> | <input type="text"/>                   |
| Other Concern [Please Specify]                                                    | <input checked="" type="radio"/> | <input type="radio"/> | <input type="text"/>                   |
