# Supplementary material for: The creation of the Global Scales for Early Development (GSED) for children aged 0–3 years: combining subject matter expert judgements with big data
Source: PubMed Central journal article supplement (PMC9853147; doi:10.1136/bmjgh-2022-009827), 2023-01-17
Supplement: bmjgh-2022-009827supp003.pdf [file bmjgh-2022-009827supp003.pdf]

Show  entriesSearch: 

|     | item                 | label                                  | modality             | voted_domain | feasibility comments | tau                  | A10                  | A50                  | A90                  |
|-----|----------------------|----------------------------------------|----------------------|--------------|----------------------|----------------------|----------------------|----------------------|----------------------|
|     | <input type="text"/> | <input type="text"/>                   | <input type="text"/> | All          | /                    | <input type="text"/> | <input type="text"/> | <input type="text"/> | <input type="text"/> |
| 320 | denfmd006            | Regard raisin                          | Direct               | cog          | 7                    | 32.75                | 3.77                 | 4.92                 | 6.34                 |
| 428 | griehd011            | Hands explore table surface            | Direct               | motor        | 4                    | 34.08                | 4.09                 | 5.31                 | 6.82                 |
| 742 | sgrfmd016            | Grasps box.                            | Direct               | motor        | 4                    | 34.89                | 4.29                 | 5.55                 | 7.12                 |
| 405 | dmcsld010            | Watches others and plays next to them. | Direct               | sem          | 3                    | 30.63                | 3.3                  | 4.36                 | 5.64                 |
| 322 | denfmd008            | Look for Yarn                          | Direct               | cog          | 3                    | 31.18                | 3.42                 | 4.5                  | 5.82                 |
| 317 | denfmd003            | Hold Rattle                            | Direct               | motor        | 3                    | 31.33                | 3.45                 | 4.54                 | 5.86                 |
| 753 | sgrred018            | Manipulates cup or spoon in play       | Direct               | motor        | 3                    | 33.56                | 3.96                 | 5.16                 | 6.62                 |
| 319 | denfmd005            | Follow 180 Degrees                     | Direct               | motor        | 3                    | 34.5                 | 4.19                 | 5.43                 | 6.97                 |
|     |                      | Secures                                |                      |              |                      |                      |                      |                      |                      |
